# Supplementary material for: The autism puzzle: Diffuse but not pervasive neuroanatomical abnormalities in children with ASD
Source: PubMed Central journal article supplement — Neuroimage Clin. 2015 Apr 15;8:170–9. doi: 10.1016/j.nicl.2015.04.008 (PMC4473820; doi:10.1016/j.nicl.2015.04.008), 2015-04-15
Supplement: mmc1.pdf [file mmc1.pdf]

## Supplementary Material

Tab. 2: IQ and total ADOS (mean  $\pm$  standard deviation) of male and female participants per group and age range

| Age Range | Control Males         | Control Females       | ASD Males             |                       | ASD Females         |                      |
|-----------|-----------------------|-----------------------|-----------------------|-----------------------|---------------------|----------------------|
|           | IQ (N)                | IQ (N)                | IQ (N)                | ADOS (N)              | IQ (N)              | ADOS (N)             |
| 4-11      | 113.4 $\pm$ 16.2 (42) | 112.7 $\pm$ 11.5 (12) | 100.4 $\pm$ 15.4 (34) | 9.91 $\pm$ 3.65 (34)  | 92.2 $\pm$ 8.1 (6)  | 10.17 $\pm$ 4.91 (6) |
| 12-18     | 111.5 $\pm$ 10.9 (69) | 105.4 $\pm$ 10.0 (10) | 99.3 $\pm$ 16.0 (22)  | 10.83 $\pm$ 3.36 (24) | 97.6 $\pm$ 10.1 (5) | 10.60 $\pm$ 5.32 (5) |
